# Supplementary material for: Comparative efficacy of Nine Non-Pharmacological Interventions for Fall Prevention in Older Adults: A Systematic Review and Network Meta-Analysis
Source: Research Square preprint supplement (doi:10.21203/rs.3.rs-6880677/v1), 2025-07-18

**Table S1. Literature search strategy.**

1. **PubMed**

| Search | Query |
| --- | --- |
| #1 | ("Aged"[Mesh]) OR (elderly[Title/Abstract]) OR (older adult[Title/Abstract]) OR (senior[Title/Abstract]) |
| #2 | ("exercise"[Mesh]) OR (non - drug intervention [Title/Abstract]) OR (cognitive [Title/Abstract]) OR (Education [Title/Abstract]) OR (physical exercise [Title/Abstract]) OR rehabilitation intervention [Title/Abstract] OR (sport [Title/Abstract]) |
| #3 | ("Randomized Controlled Trial"[Publication Type]) OR ((randomized controlled trial[Title/Abstract]) OR (randomised controlled study[Title/Abstract]) OR (RCT[Title/Abstract]) OR (random*[Title/Abstract])) |
| #4 | ("Accidental Falls"[Mesh]) OR ((((Accidental Fall[Title/Abstract]) OR (Falling[Title/Abstract])) OR (fall[Title/Abstract])) OR (Falls[Title/Abstract])) |
| #5 | #1 AND #2 AND #3 AND #4 |

**2. Cochrane Library**

| Search | Query |
| --- | --- |
| #1 | (aged):ti,ab,kw OR (elderly):ti,ab,kw OR (older adult):ti,ab,kw OR (senior):ti,ab,kw |
| #2 | (non-drug intervention):ti,ab,kw OR (cognitive):ti,ab,kw OR (education):ti,ab,kw OR (physical exercise):ti,ab,kw OR (rehabilitation intervention):ti,ab,kw OR (sport):ti,ab,kw |
| #3 | (randomized controlled trial):ti,ab,kw OR (randomised controlled study):ti,ab,kw OR (RCT):ti,ab,kw OR (random*):ti,ab,kw |
| #4 | (Accidental Fall):ti,ab,kw OR (Falling):ti,ab,kw OR (fall):ti,ab,kw OR (Falls):ti,ab,kw |
| #5 | #1 AND #2 AND #3 AND #4 |

**3. Embase**

| Search | Query |
| --- | --- |
| #1 | 'elderly'/exp |
| #2 | 'older adult':ab,ti OR 'senior':ab,ti OR 'aged people':ab,ti OR 'older persons':ab,ti |
| #3 | #1 OR #2 |
| #4 | 'exercise'/exp |
| #5 | 'non-drug intervention':ab,ti OR 'cognitive':ab,ti OR 'education':ab,ti OR 'physical exercise':ab,ti OR 'rehabilitation intervention':ab,ti OR 'sport':ab,ti |
| #6 | #4 OR #5 |
| #7 | 'randomized controlled trial'/exp |
| #8 | 'randomized controlled trial':ab,ti OR 'randomised controlled study':ab,ti OR 'RCT':ab,ti OR 'random*':ab,ti |
| #9 | #7 OR #8 |
| #10 | 'falling'/exp |
| #11 | 'accidental fall':ab,ti OR 'falling':ab,ti OR 'fall':ab,ti OR 'falls':ab,ti OR 'falling down':ab,ti OR 'unintentional fall':ab,ti |
| #12 | #10 OR #11 |
| #13 | #3 AND #6 AND #9 AND #12 |

**4. Web of Science**

| Search | Query |
| --- | --- |
| #1 | TS=("elderly" OR "older adult" OR "senior" OR "older people") |
| #2 | TS=("exercise" OR "physical exercise" OR "non-drug intervention" OR "cognitive training" OR "balance training" OR "strength training" OR "rehabilitation intervention" OR "fall prevention education") |
| #3 | TS=("randomized controlled trial" OR "RCT" OR "randomised controlled trial") |
| #4 | TS=("fall" OR "falls" OR "accidental fall" OR "unintentional fall" OR "fall risk") |
| #5 | #1 AND #2 AND #3 AND #4 |

**Fig S1 League Schedule with Intervention Period ≤ 4 Months**


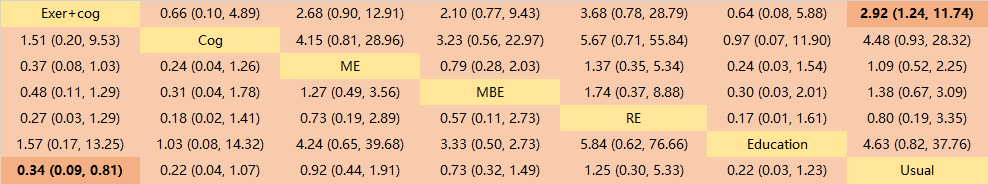


**Fig S2. Forest Plot with Intervention Period ≤ 4 Months**
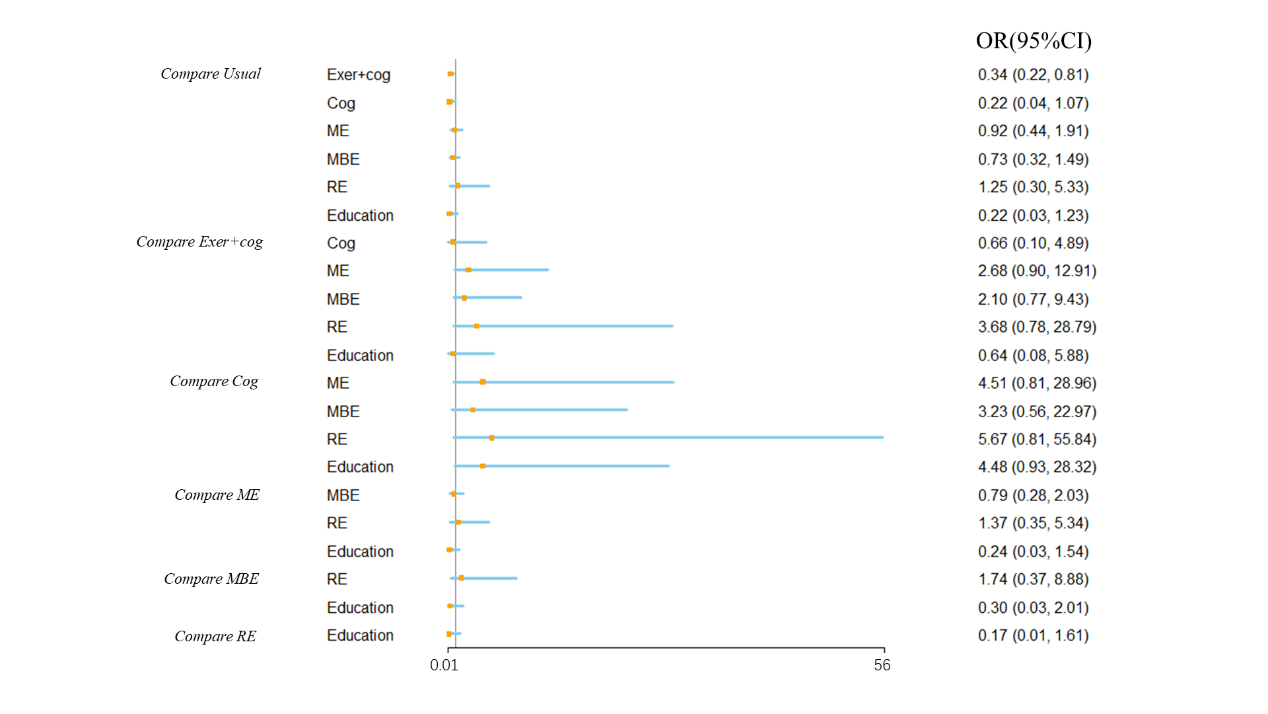


**Fig S3. League Table with Intervention Period 4-8 Months**
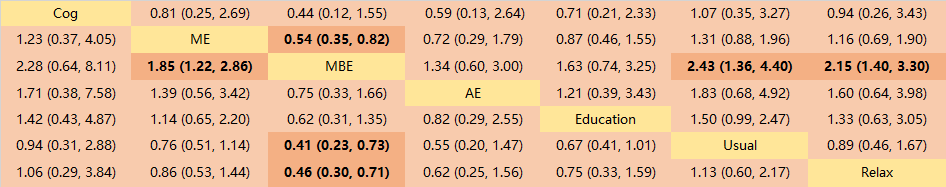


**Fig S4. Forest Plot with Intervention Period 4-8 Months**
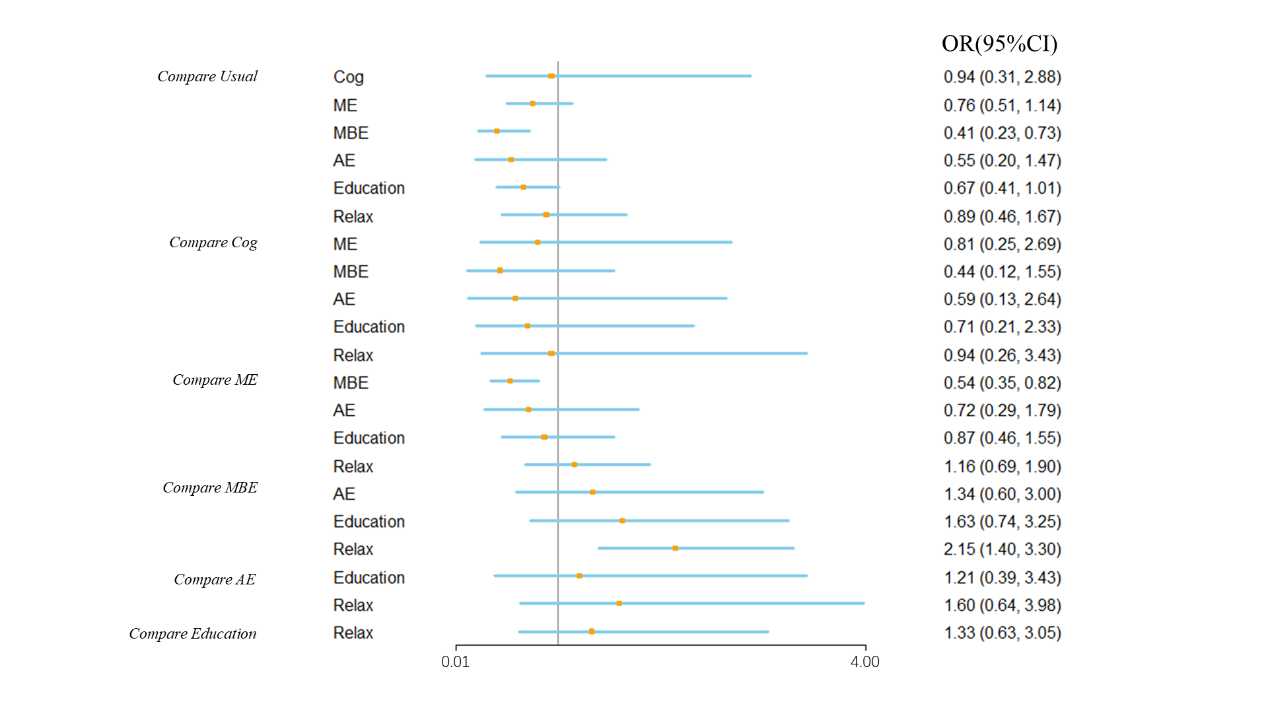


**Fig S5. League Table with Intervention Period > 8 Months**
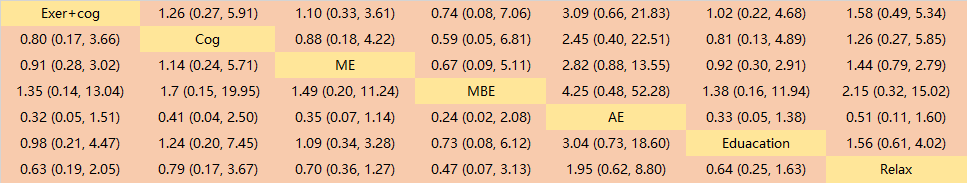


**Fig S6. Forest Plot with Intervention Period > 8 Months**
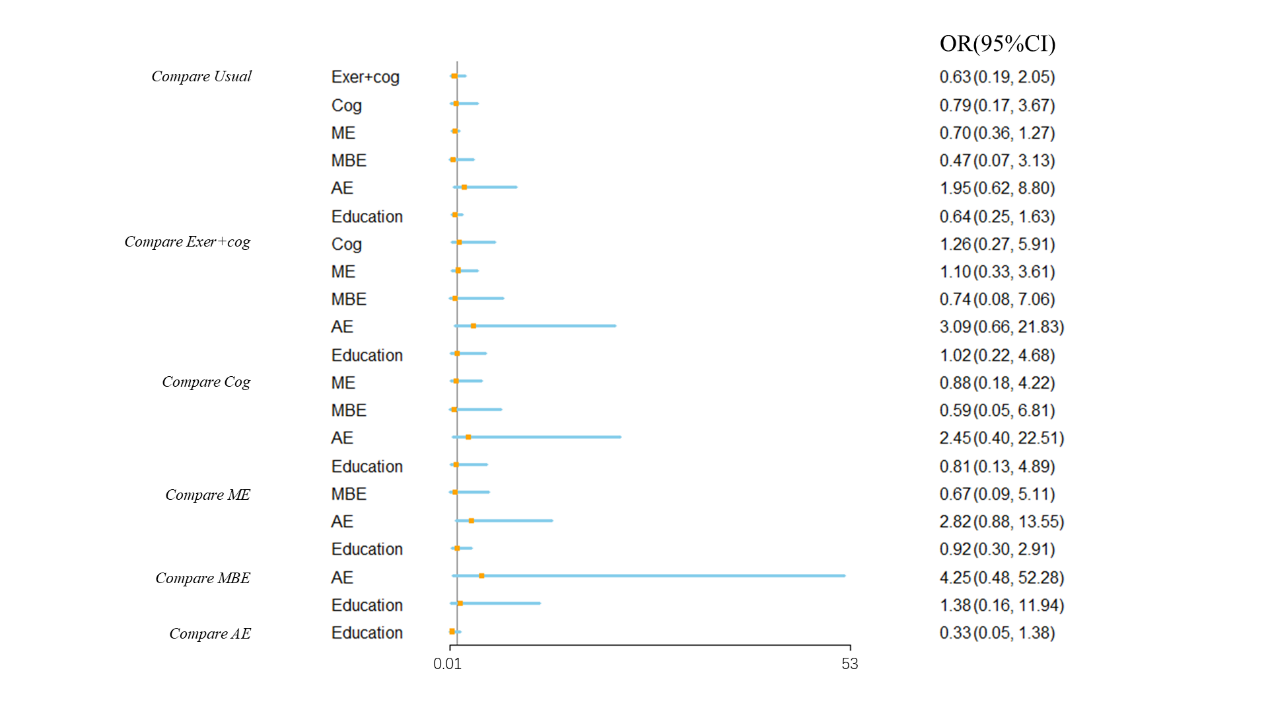


**Fig S7. League Table with Female Proportion between 50-80%**
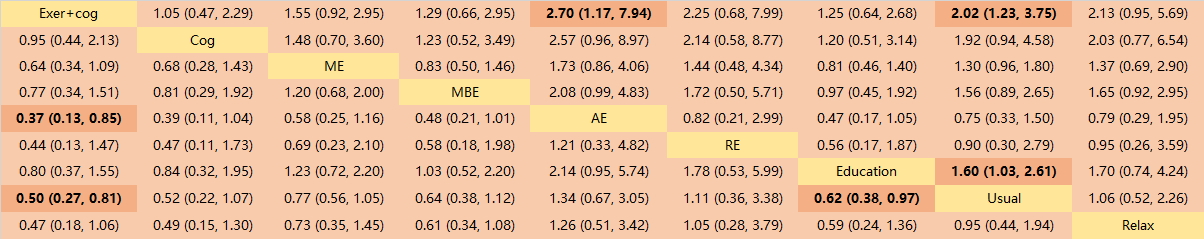


**Fig S8. Forest Plot with Female Proportion between 50-80%**
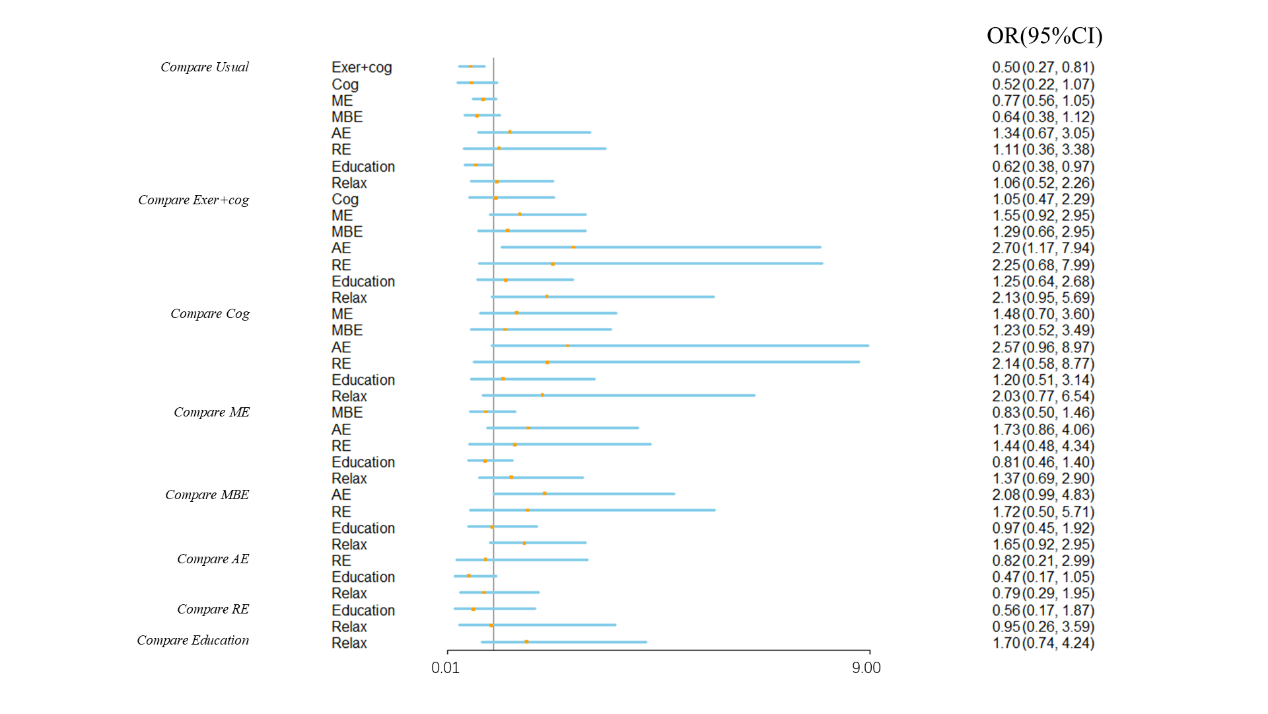


**Fig S9. League Table of Sensitivity Analysis**
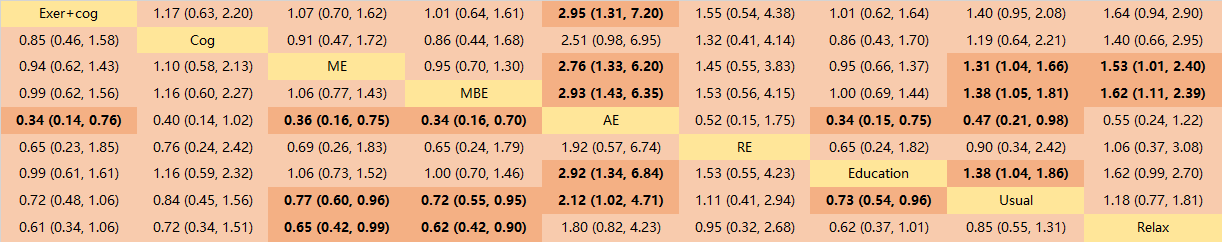


**Fig S10. Forest Plot of Sensitivity Analysis**
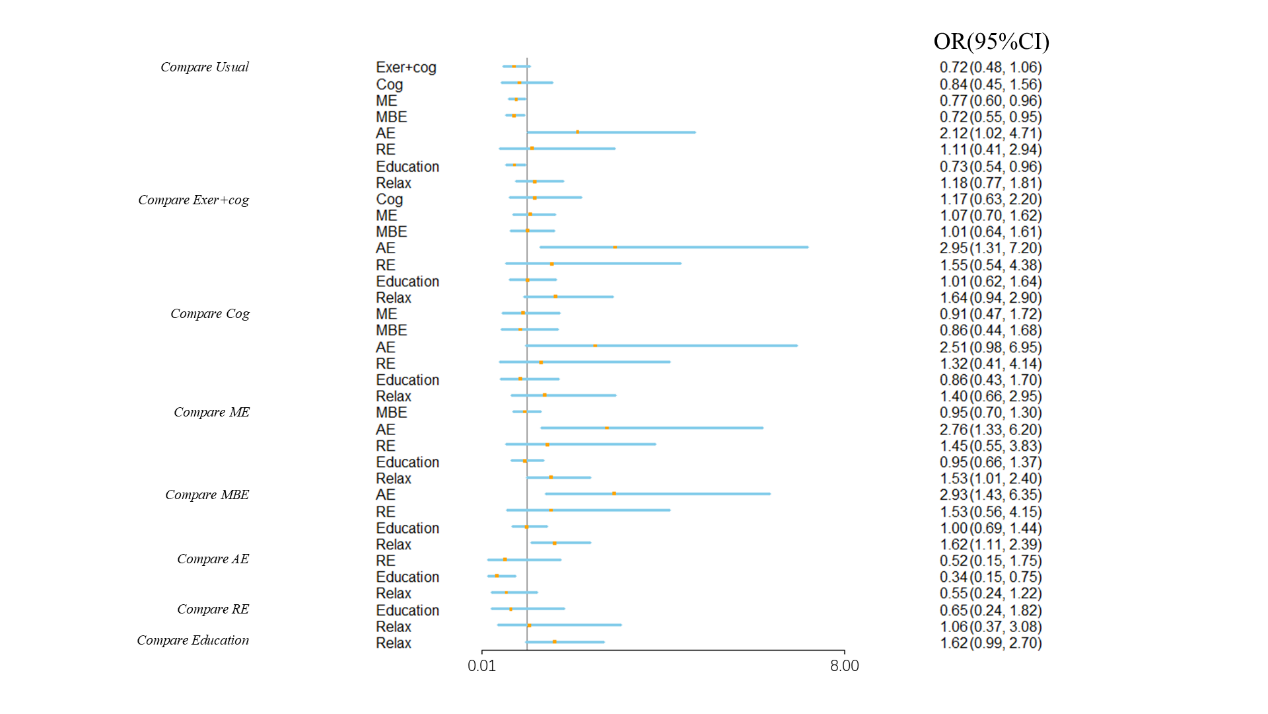

Supplement: Supplementary file 1 [file 7c9f727c5050ba9339ee3c33.docx]
